# Supplementary material for: Harmonization of the intracellular cytokine staining assay
Source: Springer Nature journal article supplement (doi:10.1007/s00262-012-1282-9), 2012-05-21
Supplement: MOESM1 [file 8232060]

A

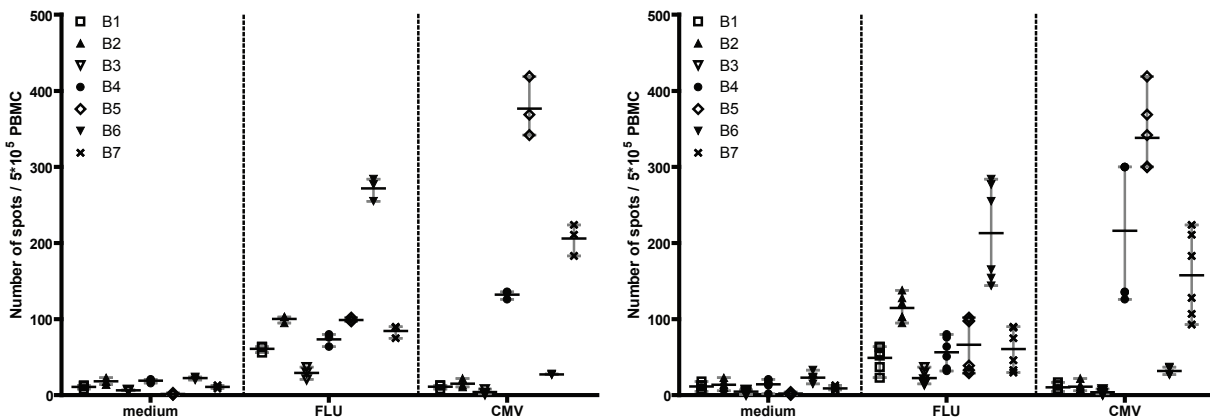

B

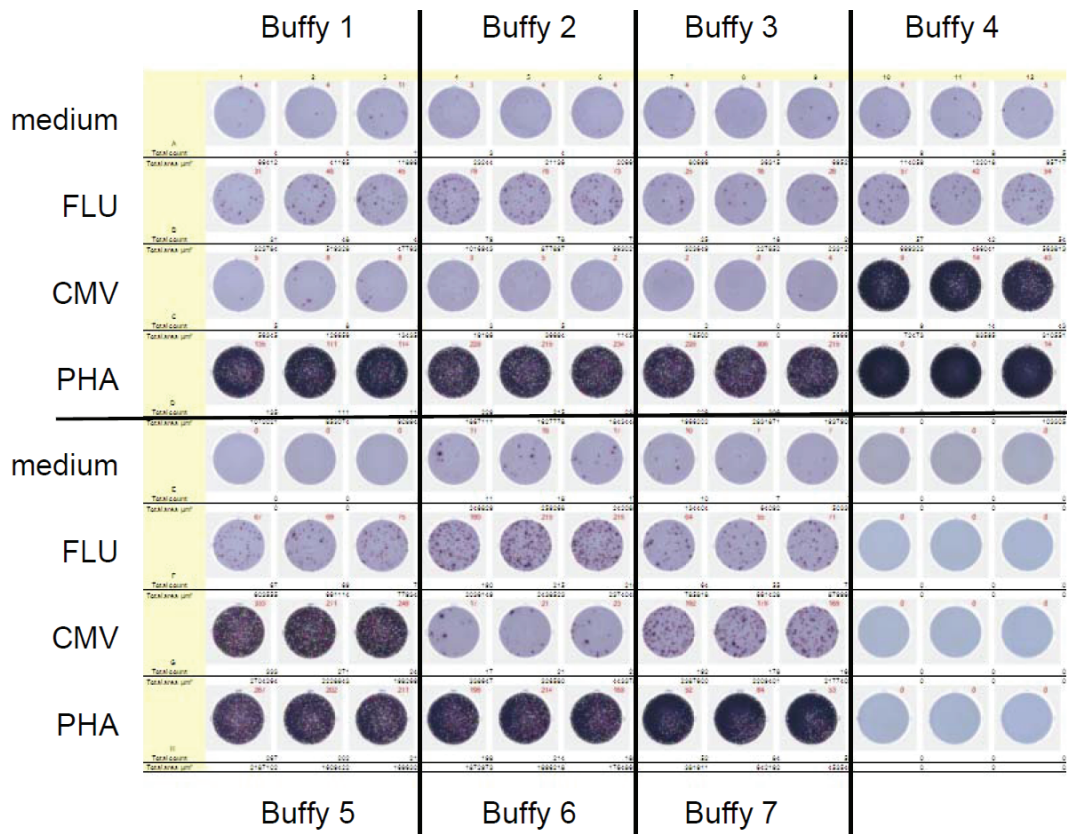

### Online resource 1: Pre-screening of donors by IFN $\gamma$ -ELISPOT

(A) The IFN $\gamma$ -ELISPOT results are depicted. Left graph shows the first screening test (in triplicate wells) and the right graph the combined data of this first and a second independent screening test. PBMC isolated from 7 buffy coats (B) were analyzed for their recognition of the model antigens influenza M1 (FLU) or human pp65 CMV (CMV). (B) As an example the IFN $\gamma$ -ELISPOT plate of the first pre-test is shown. PHA was taken along as a positive control.

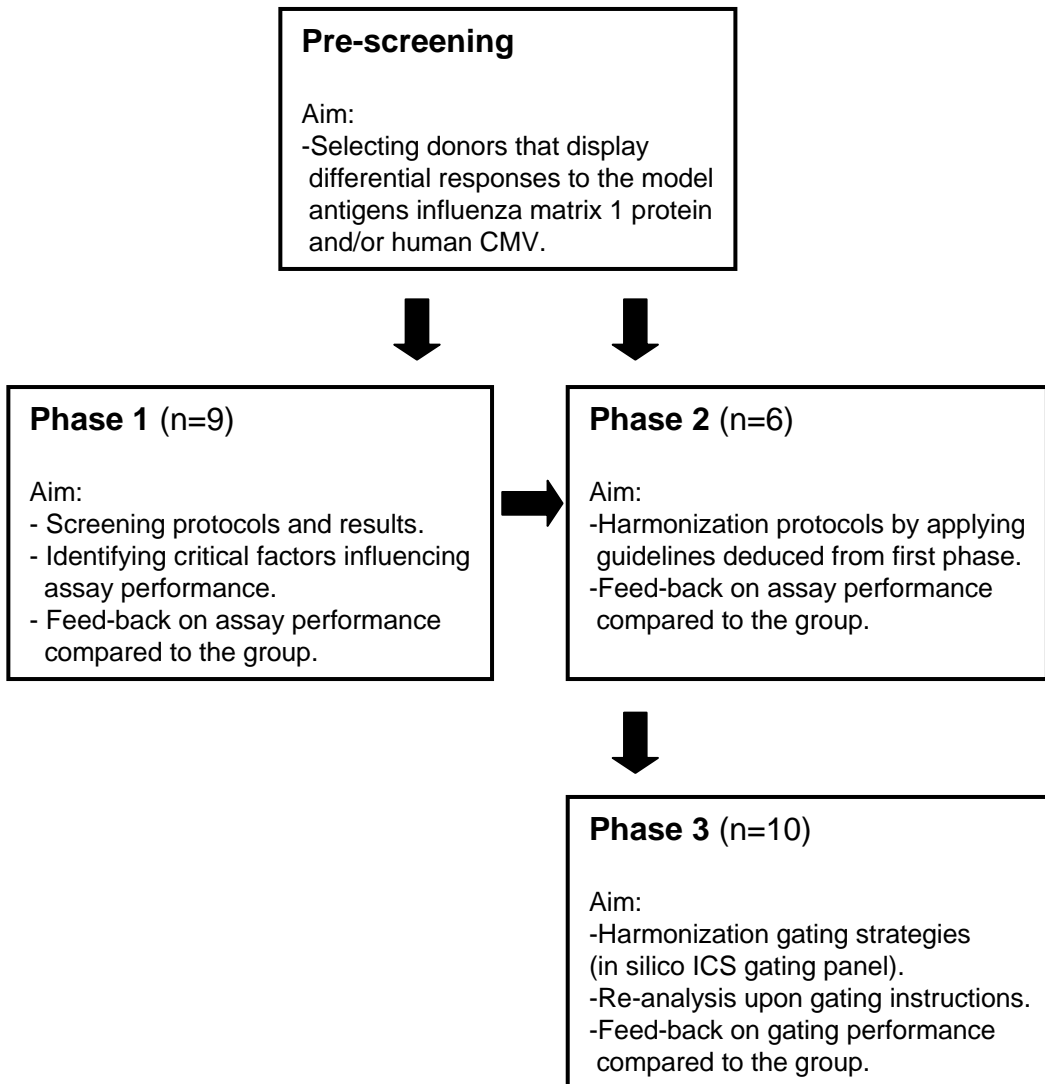

Online resource 2: **Schematic overview of the three consecutive proficiency panels**

A

| ID | Resting time (hours) | Number of cells per test | Peptide conc. (µg/ml) | Medium | Serum    | CD8 antibody |              |           |          | CD3 antibody |              |         |          |
|----|----------------------|--------------------------|-----------------------|--------|----------|--------------|--------------|-----------|----------|--------------|--------------|---------|----------|
|    |                      |                          |                       |        |          | Clone        | Fluor chrome | Company   | Dilution | Clone        | Fluor chrome | Company | Dilution |
| 5  | 16                   | 2 x 10e6                 | 2                     | RPMI   | human AB | SK1          | PerCP        | BD        | 1:5      | UCHT1        | PE           | BD      | 1:5      |
| 8  | 16                   | 2 x 10e6                 | 5                     | IMDM   | human AB | SFC121 ThyD3 | PE-Cy7       | BC        | 1:120    | 13B8.2#      | APC          | BC      | 1:75     |
| 9  | 26                   | 1-2 x 10e6               | 5                     | IMDM   | human AB | SK1          | APC-Cy7      | BD        | 1:50     | UCHT1        | Pe-Cy7       | BD      | 1:50     |
| 10 | 0                    | 2 x 10e6                 | 5                     | X-VIVO | none     | SK1          | APC-H7       | BD        | 1:16     | UCHT1        | PE           | Caltag  | 1:25     |
| 13 | 2                    | 1 x 10e6                 | 1                     | RPMI   | human AB | SK1          | PerCP        | BD        | 1:10     | UCHT1        | PE           | BD      | 1:10     |
| 15 | 18                   | 1 x 10e6                 | 5                     | RPMI   | FCS      | SK1          | FITC         | BD        | 1:50     | SK7          | PerCP-Cy5    | BD      | 1:50     |
| 22 | 16                   | 2 x 10e6                 | 5                     | IMDM   | human AB | SK1          | APC          | BD        | 1:10     | SK7          | PerCP        | BD      | 1:5      |
| 24 | 2                    | 0.25 x 10e6              | 5                     | RPMI   | FCS      | BW 135/80    | APC          | Milthenyi | 1:20     | UCHT1        | PE           | BC      | 1:20     |
| 26 | 16                   | 0.7-1.7 x 10e6           | 2                     | IMDM   | human AB | SK1          | PerCP        | BD        | 1:2.5    | UCHT1        | FITC         | BC      | 1:5      |

| ID | IFNγ antibody |              | Company | Dilution | Secretion blocking reagent (final conc.) | Addition of blocking reagent after | Activation time | Lyse/fix reagent        | Permealization reagent | Duration of IFNγ staining |
|----|---------------|--------------|---------|----------|------------------------------------------|------------------------------------|-----------------|-------------------------|------------------------|---------------------------|
|    | Clone         | Fluor chrome |         |          |                                          |                                    |                 |                         |                        |                           |
| 5  | 4S.B3         | FITC         | BD      | 1:25     | Golgi-Stop (1 µl/ml)                     | 1 hour                             | overnight       | Fix (Dako)              | Perm (Dako)            | 15 min at RT              |
| 8  | B27           | FITC         | BD      | 1:200    | Brefeldin A (50 µg/ml)                   | Immediately                        | 5 hours         | Fix (BD)                | Perm (BD)              | 30 min at 4°C             |
| 9  | 4S.B3         | FITC         | BD      | 1:50     | Brefeldin A (10 µg/ml)                   | 1 hour                             | overnight       | 4% paraphormaldehyde    | saponine               | 30 min at 4°C             |
| 10 | B27           | PE-Cy7       | BD      | 1:10     | Golgi-Plug (1 µg/ml)                     | 1.5 hours                          | overnight       | Fix (BD)                | Perm (BD)              | 30 min at 4°C             |
| 13 | 4S.B3         | FITC         | BD      | 1:50     | Golgi-Stop (1 µl/ml)                     | 1 hour                             | overnight       | Fix (Dako)              | Perm (Dako)            | 15 min at RT              |
| 15 | B27           | APC          | BD      | n.a.     | Brefeldin A (10 µg/ml)                   | 1 hour                             | 6 hours         | 1% Formaldehyd-2mM EDTA | saponine               | 20 min at 4°C             |
| 22 | 25723.11      | FITC         | BD      | 1:2.5    | Brefeldin A (7.5 µg/ml)                  | 1 hour                             | 6 hours         | Lyse (BD)               | Perm (BD)              | 30 min at 4°C             |
| 24 | 25723.11      | FITC         | BD      | 1:10     | Brefeldin A (10 µg/ml)                   | 2 hours                            | 6 hours         | Fix (An der Grub)       | Perm (An der Grub)     | 15 min at 4°C             |
| 26 | 45-15         | APC          | IQP     | 1:50     | Brefeldin A (n.a.)                       | 2 hours                            | 6 hours         | Lyse (BD)               | Perm (BD)              | 30 min at 4°C             |

B

| ID | Resting time (hours) | Number of cells per test | Peptide conc. (µg/ml) | Medium* | Serum* | CD4 antibody |              |           |          | CD3 antibody |              |         |          |
|----|----------------------|--------------------------|-----------------------|---------|--------|--------------|--------------|-----------|----------|--------------|--------------|---------|----------|
|    |                      |                          |                       |         |        | Clone        | Fluor chrome | Company   | Dilution | Clone        | Fluor chrome | Company | Dilution |
| 8  | 16                   | 2 x 10e6                 | 5                     | X-VIVO  | none   | 13B8.2       | PE           | BC        | 1:75     | S4.1         | APC          | Caltag  | 1:75     |
| 9  | 24                   | 2 x 10e6                 | 5                     | X-VIVO  | none   | SK3          | Pe-Cy7       | BD        | 1:50     | UCHT1        | PB           | DAKO    | 1:20     |
| 10 | 0                    | 2 x 10e6                 | 10                    | X-VIVO  | none   | RPA-T4       | PB           | Biologend | 1:250    | UCHT1        | PE           | Caltag  | 1:50     |
| 15 | 8                    | 5 x 10e6                 | 5                     | X-VIVO  | none   | RPA-T4       | Fitc         | BD        | 1:10     | SK7          | PercP        | BD      | 1:10     |
| 22 | 24                   | 3 x 10e6                 | 5                     | X-VIVO  | none   | SK3          | APC          | BD        | 1:16     | SK7          | PercP        | BD      | 1:5      |
| 24 | 1                    | 1x 10e6                  | 2                     | X-VIVO  | none   | SK3          | PercP        | BD        | 1:10     | UCHT1        | Fitc         | BD      | 1:10     |

| ID | IFNγ antibody |              | Company | Dilution | Secretion blocking reagent (final concentration) | Addition of blocking reagent after | Activation time | Lyse/fix reagent       | Permealization reagent | Duration of IFNγ staining |
|----|---------------|--------------|---------|----------|--------------------------------------------------|------------------------------------|-----------------|------------------------|------------------------|---------------------------|
|    | Clone         | Fluor chrome |         |          |                                                  |                                    |                 |                        |                        |                           |
| 8  | B27           | FITC         | BD      | 1:200    | Brefeldin A (10 µg/ml)                           | 1 hour                             | 6 hours         | Cytofix/Cytoperm (BD)  | saponine               | 30 min at 4°C             |
| 9  | 4S.B3         | FITC         | BD      | 1:50     | brefeldin A (10 µg/ml)                           | 1 hour                             | 18 hours        | 4% paraphormaldehyde   | saponine               | 30 min at 4°C             |
| 10 | B27           | PE-Cy7       | BD      | 1:20     | GolgiPlug (1 µg/ml)                              | Immediately                        | overnight       | Cytofix/Cytoperm (BD)  | Perm/Wash (BD)         | 30 min at 4°C             |
| 15 | 25723.11      | APC          | BD      | 1:33     | Brefeldin A (5 µg/ml)                            | Immediately                        | 12 hours        | Permwash (eBioscience) | eBioscience            | 25 min at 4°C             |
| 22 | 25723.11      | FITC         | BD      | 1:2.5    | Brefeldin A (7.5 µg/ml)                          | 2 hours                            | 18 hours        | Lyse (BD)              | Perm (BD)              | 20 min at 4°C             |
| 24 | 25723.11      | PE           | BD      | 1:5      | Brefeldin A (10 µg/ml)                           | 2 hours                            | 6 hours         | Lyse (BD)              | Perm (An der Grub)     | 15 min at 4°C             |

### Online resource 3: ICS protocol variables

The variables in the wet protocol of the ICS as conducted in proficiency panels 1 (A) and 2 (B) are given. \* indicates the obligatory recommendations; # not a CD3 but CD4 antibody was used; BD, Becton Dickenson; BC, Beckman Coulter; PC, pacific blue; n.a. information not available.

| <b>Phase</b> | <b>Parameter</b>                                       | <b>Average</b>        | <b>Median</b>         | <b>Range</b>                | <b>CV (%)</b> |
|--------------|--------------------------------------------------------|-----------------------|-----------------------|-----------------------------|---------------|
| <b>1</b>     | <b>Number of viable cells (directly after thawing)</b> | 15.5x10 <sup>6</sup>  | 15.1 x10 <sup>6</sup> | 4.9 - 39.7 x10 <sup>6</sup> | 43.9          |
|              | <b>% Dead cells (directly after thawing)</b>           | 16.0                  | 9.3                   | 3.6 - 53.3                  | 87.7          |
|              | <b>Number of viable cells (after resting)</b>          | 11.4 x10 <sup>6</sup> | 10.6 x10 <sup>6</sup> | 2.7 - 34.2 x10 <sup>6</sup> | 61.1          |
|              | <b>% Dead cells (after resting)</b>                    | 24.6                  | 10.7                  | 1.5 - 82.0                  | 97.0          |
|              | <b>Number of lymphocytes</b>                           | 278521                | 163873                | 9198-1229921                | 114           |
|              | <b>Number of CD8+ T-cells</b>                          | 63105                 | 25703                 | 623-335556                  | 131           |
|              | <b>% CD8+ T-cells</b>                                  | 21.6                  | 20.8                  | 7.4-35.6                    | 36.9          |
| <b>2</b>     | <b>Number of lymphocytes</b>                           | 675243                | 715001                | 199922-1349327              | 33.7          |
|              | <b>Number of CD3+ T-cells</b>                          | 591350                | 556426                | 143889-1200000              | 41.3          |
|              | <b>% CD3+ T-cells</b>                                  | 78.4                  | 79.0                  | 57.7-93.0                   | 9.9           |
|              | <b>Number of CD3+CD4- T-cells</b>                      | 204433                | 191131                | 52234-495797                | 49.4          |
|              | <b>% CD3+CD4- T-cells</b>                              | 34.0                  | 32.3                  | 19.1-47.0                   | 19.1          |
| <b>3</b>     | <b>Number of lymphocytes</b>                           | 507956                | 505967                | 411364-673447               | 10.3          |
|              | <b>Number of CD3+ T-cells</b>                          | 418646                | 419665                | 319571-559130               | 11.0          |
|              | <b>% CD3+ T-cells</b>                                  | 82.4                  | 83.8                  | 76.1-85.9                   | 3.6           |
|              | <b>Number of CD3+CD4- T-cells</b>                      | 160623                | 164364                | 85598-263390                | 26.4          |
|              | <b>% CD3+CD4- T-cells</b>                              | 38.3                  | 43.5                  | 22.1-48.5                   | 22.6          |

**Online resource 4A: Parameters in the 3 phases of the ICS proficiency panels.**

| CMV            |       |              |              |       |              |
|----------------|-------|--------------|--------------|-------|--------------|
| ID             | D1    | D2           | D3           | D4    | D5           |
| 5              | 0.360 | <b>3.000</b> | <b>1.780</b> | 0.060 | <b>0.140</b> |
| 8              | 0.010 | <b>7.590</b> | <b>1.620</b> | 0.010 | <b>0.070</b> |
| 9              | 0.060 | <b>4.870</b> | <b>1.300</b> | 0.000 | <b>0.230</b> |
| 10             | 0.000 | <b>4.696</b> | <b>1.771</b> | 0.013 | <b>0.105</b> |
| 13             | 1.205 | <b>8.169</b> | <b>13.17</b> | 0.941 | 0.046        |
| 15             | 0.000 | 0.000        | <b>0.330</b> | 0.050 | <b>5.680</b> |
| 22             | 0.000 | <b>5.280</b> | <b>5.090</b> | 0.000 | 0.000        |
| 24             | 0.000 | <b>1.540</b> | <b>4.020</b> | 0.000 | 0.040        |
| 26             | 0.128 | 0.100        | 0.000        | 0.000 | 0.100        |
| <b>Median</b>  | 0.010 | 4.696        | 1.771        | 0.010 | 0.100        |
| <b>Average</b> | 0.196 | 3.916        | 3.231        | 0.119 | 0.712        |
| <b>SD</b>      | 0.396 | 2.986        | 4.066        | 0.309 | 1.864        |
| <b>CV</b>      | 202   | 76.3         | 126          | 259   | 262          |

| FLU            |              |              |              |              |              |
|----------------|--------------|--------------|--------------|--------------|--------------|
| ID             | D1           | D2           | D3           | D4           | D5           |
| 5              | <b>0.560</b> | <b>0.880</b> | <b>1.220</b> | <b>0.140</b> | <b>0.270</b> |
| 8              | <b>0.030</b> | 0.010        | <b>0.070</b> | <b>0.160</b> | <b>0.040</b> |
| 9              | <b>0.060</b> | <b>0.020</b> | <b>0.120</b> | 0.010        | <b>0.020</b> |
| 10             | 0.017        | 0.012        | <b>0.091</b> | <b>0.095</b> | <b>0.054</b> |
| 13             | <b>0.352</b> | 0.000        | <b>0.176</b> | <b>0.083</b> | 0.046        |
| 15             | 0.000        | 0.000        | <b>0.210</b> | <b>0.070</b> | <b>0.050</b> |
| 22             | 0.030        | 0.000        | 0.000        | 0.000        | 0.000        |
| 24             | 0.000        | 0.000        | <b>1.710</b> | 0.060        | 0.060        |
| 26             | 0.000        | 0.000        | 0.000        | 0.160        | 0.000        |
| <b>median</b>  | 0.030        | 0.000        | 0.120        | 0.083        | 0.046        |
| <b>average</b> | 0.117        | 0.102        | 0.400        | 0.086        | 0.060        |
| <b>SD</b>      | 0.200        | 0.292        | 0.620        | 0.059        | 0.082        |
| <b>CV</b>      | 172          | 285          | 155          | 68.5         | 136          |

**Online resource 4B: Percentage of IFN $\gamma$ -producing CD3+CD8+ T cells as reported by participants in Phase 1 of ICS panel.**

In bold the positive responses (i.e. at least twice above the negative control with a clearly visible population of events). The values are the percentages of IFN $\gamma$ +CD3+CD8+ T cells after subtraction of the negative control value. The gray boxes indicate the donor (D)-antigen (CMV or FLU) combinations which were found to be negative in the pre-screening test.

| CMV            |       |              |              |       |              |
|----------------|-------|--------------|--------------|-------|--------------|
| ID             | D1    | D2           | D3           | D4    | D5           |
| 8              | 0.000 | <b>4.810</b> | <b>1.040</b> | 0.010 | <b>0.030</b> |
| 9              | 0.003 | <b>8.727</b> | <b>3.623</b> | 0.002 | <b>0.080</b> |
| 10             | 0.000 | <b>4.753</b> | <b>0.846</b> | 0.007 | <b>0.049</b> |
| 15             | 0.002 | <b>12.40</b> | <b>8.505</b> | 0.001 | <b>0.107</b> |
| 22             | 0.000 | <b>1.827</b> | <b>4.102</b> | 0.000 | <b>0.029</b> |
| 24             | 0.000 | <b>2.820</b> | <b>0.730</b> | 0.000 | 0.030        |
| <b>Median</b>  | 0.000 | 4.781        | 2.332        | 0.002 | 0.040        |
| <b>Average</b> | 0.001 | 5.889        | 3.141        | 0.003 | 0.054        |
| <b>SD</b>      | 0.001 | 3.969        | 3.014        | 0.004 | 0.033        |
| <b>CV</b>      | 165   | 67.4         | 96.0         | 126   | 60.0         |

| FLU            |              |              |              |              |              |
|----------------|--------------|--------------|--------------|--------------|--------------|
| ID             | D1           | D2           | D3           | D4           | D5           |
| 8              | 0.000        | 0.000        | <b>0.010</b> | <b>0.060</b> | 0.000        |
| 9              | <b>0.015</b> | <b>0.027</b> | <b>0.115</b> | <b>0.133</b> | <b>0.027</b> |
| 10             | 0.001        | 0.000        | <b>0.025</b> | <b>0.091</b> | <b>0.012</b> |
| 15             | <b>0.033</b> | <b>0.026</b> | <b>0.145</b> | <b>0.209</b> | 0.015        |
| 22             | 0.006        | <b>0.061</b> | <b>0.202</b> | <b>0.079</b> | <b>0.013</b> |
| 24             | 0.030        | 0.010        | <b>0.100</b> | 0.020        | 0.010        |
| <b>median</b>  | 0.011        | 0.018        | 0.108        | 0.085        | 0.012        |
| <b>average</b> | 0.014        | 0.021        | 0.099        | 0.099        | 0.013        |
| <b>SD</b>      | 0.014        | 0.023        | 0.073        | 0.066        | 0.009        |
| <b>CV</b>      | 101          | 112          | 73.1         | 66.5         | 67.9         |

**Online resource 4C: Percentage of IFN $\gamma$ -producing CD3+CD4-negative T cells as reported by participants in Phase 2 of ICS panel.**

In bold the positive responses (i.e. at least twice above the negative control with a clearly visible population of events). The values are the percentages of IFN $\gamma$ +CD3+CD4-negative T cells after subtraction of the negative control value. The gray boxes indicate the donor (D)-antigen (CMV or FLU) combinations which were found to be negative in the pre-screening test.

| Lab ID         | Medium |       |       | CMV   |              |             | FLU         |             |             |
|----------------|--------|-------|-------|-------|--------------|-------------|-------------|-------------|-------------|
|                | D1     | D2    | D5    | D1    | D2           | D5          | D1          | D2          | D5          |
| 8              | 0.01   | 0.02  | 0.01  | 0.00  | <b>10.42</b> | <b>0.11</b> | <b>0.02</b> | <b>0.04</b> | <b>0.05</b> |
| 9              | 0.01   | 0.02  | 0.01  | 0.00  | <b>9.52</b>  | <b>0.10</b> | <b>0.03</b> | <b>0.03</b> | <b>0.04</b> |
| 10             | 0.01   | 0.04  | 0.03  | 0.00  | <b>11.46</b> | <b>0.10</b> | <b>0.03</b> | <b>0.06</b> | <b>0.05</b> |
| 11             | 0.13   | 0.21  | 0.10  | 0.06  | <b>13.09</b> | <b>0.12</b> | 0.01        | 0.16        | 0.08        |
| 12             | 0.80   | 0.90  | 0.04  | 0.00  | <b>10.91</b> | <b>0.08</b> | 0.00        | 0.12        | <b>0.04</b> |
| 14             | 0.01   | 0.02  | 0.01  | 0.00  | <b>12.48</b> | <b>0.14</b> | <b>0.04</b> | <b>0.04</b> | <b>0.07</b> |
| 15             | 0.01   | 0.03  | 0.01  | 0.00  | <b>11.67</b> | <b>0.10</b> | <b>0.03</b> | <b>0.04</b> | <b>0.05</b> |
| 16             | 0.01   | 0.05  | 0.09  | 0.00  | <b>12.55</b> | <b>0.11</b> | <b>0.03</b> | <b>0.05</b> | 0.05        |
| 22             | 0.05   | 0.04  | 0.06  | 0.00  | <b>12.46</b> | <b>0.10</b> | 0.03        | <b>0.05</b> | 0.04        |
| 24             | 0.30   | 0.20  | 0.10  | 0.00  | <b>12.80</b> | <b>0.20</b> | 0.00        | <b>0.10</b> | 0.10        |
| <b>Median</b>  | 0.010  | 0.040 | 0.044 | 0.00  | 12.07        | 0.11        | 0.030       | 0.050       | 0.050       |
| <b>Average</b> | 0.13   | 0.15  | 0.046 | 0.006 | 11.73        | 0.12        | 0.022       | 0.069       | 0.057       |
| <b>SD</b>      | 0.26   | 0.28  | 0.040 | 0.019 | 1.16         | 0.033       | 0.014       | 0.043       | 0.020       |
| <b>CV</b>      | 196    | 185   | 87.6  | 316   | 9.88         | 28.8        | 63.6        | 62.4        | 35.1        |

**Online resource 5A: Phase 3 results of in silico ICS gating panel.**

In bold the positive responses (i.e. at least twice above the negative control). Note that for CMV and FLU the values are shown after subtraction of medium control.

| Lab ID         | Medium |       |       | CMV |              |             | FLU         |             |             |
|----------------|--------|-------|-------|-----|--------------|-------------|-------------|-------------|-------------|
|                | D1     | D2    | D5    | D1  | D2           | D5          | D1          | D2          | D5          |
| 8              | 0.01   | 0.02  | 0.01  |     | <b>10.42</b> | <b>0.11</b> | <b>0.02</b> | <b>0.04</b> | <b>0.05</b> |
| 9              | 0.01   | 0.02  | 0.01  |     | <b>9.52</b>  | <b>0.10</b> | <b>0.03</b> | <b>0.03</b> | <b>0.04</b> |
| 10             | 0.01   | 0.04  | 0.03  |     | <b>11.46</b> | <b>0.10</b> | <b>0.03</b> | <b>0.06</b> | <b>0.05</b> |
| 11             | 0.01   | 0.03  | 0.07  |     | <b>12.44</b> | <b>0.11</b> | <b>0.03</b> | <b>0.03</b> | 0.03        |
| 12             | 0      | 0.03  | 0.02  |     | <b>11.62</b> | <b>0.10</b> | <b>0.03</b> | <b>0.04</b> | <b>0.05</b> |
| 14             | 0.01   | 0.02  | 0.01  |     | <b>12.48</b> | <b>0.14</b> | <b>0.04</b> | <b>0.04</b> | <b>0.07</b> |
| 15             | 0.01   | 0.03  | 0.01  |     | <b>11.67</b> | <b>0.10</b> | <b>0.03</b> | <b>0.04</b> | <b>0.05</b> |
| 16             | 0.01   | 0.05  | 0.09  |     | <b>12.55</b> | <b>0.11</b> | <b>0.03</b> | <b>0.05</b> | 0.05        |
| 22             | 0.05   | 0.04  | 0.06  |     | <b>12.46</b> | <b>0.10</b> | 0.03        | <b>0.05</b> | 0.04        |
| 24             | 0.01   | 0.05  | 0.03  |     | <b>11.83</b> | <b>0.13</b> | <b>0.03</b> | 0.03        | <b>0.05</b> |
| <b>Median</b>  | 0.010  | 0.030 | 0.025 |     | 11.75        | 0.11        | 0.030       | 0.040       | 0.050       |
| <b>Average</b> | 0.013  | 0.033 | 0.034 |     | 11.65        | 0.109       | 0.030       | 0.042       | 0.048       |
| <b>SD</b>      | 0.013  | 0.012 | 0.029 |     | 0.99         | 0.014       | 0.005       | 0.009       | 0.011       |
| <b>CV</b>      | 102.8  | 35.2  | 85.6  |     | 8.54         | 12.6        | 17.3        | 22.3        | 22.1        |

**Online resource 5B: Re-analysis of in silico ICS gating panel after new gating instructions.**

In bold the positive responses (i.e. at least twice above the negative control). Note that for CMV and FLU the values are shown after subtraction of medium control. The gray boxes indicate the 3 labs that performed the re-analysis.
